# Supplementary material
Source: PubMed Central journal article supplement (PMC3755028)
Supplement: NIHMS494270-supplement-01.pdf [file NIHMS494270-supplement-01.pdf]

## Supplemental Data

**Supplemental Table 1.** Toxicities in the TBI and FLU/TBI arms according to the Common Toxicity Criteria.

| Toxicity (no.)          | TBI arm        |   |   |   | FLU/TBI arm    |   |    |    |
|-------------------------|----------------|---|---|---|----------------|---|----|----|
|                         | Toxicity grade |   |   |   | Toxicity grade |   |    |    |
|                         | 1              | 2 | 3 | 4 | 1              | 2 | 3  | 4  |
| Blood/bone marrow       | 0              | 7 | 7 | 8 | 3              | 5 | 10 | 10 |
| Renal                   | 7              | 5 | 2 | 1 | 3              | 5 | 2  | 4  |
| Hepatic                 | 5              | 2 | 4 | 0 | 3              | 2 | 5  | 1  |
| Gastrointestinal        | 6              | 3 | 4 | 0 | 0              | 5 | 3  | 0  |
| Constitutional symptoms | 1              | 5 | 0 | 0 | 1              | 1 | 0  | 0  |
| Cardiac                 | 1              | 0 | 5 | 1 | 0              | 5 | 3  | 2  |
| Pulmonary               | 0              | 1 | 3 | 2 | 1              | 1 | 8  | 5  |
| Coagulation             | 0              | 0 | 0 | 0 | 0              | 0 | 0  | 0  |
| Hemorrhagic             | 0              | 1 | 1 | 1 | 0              | 0 | 3  | 0  |
| Metabolic/laboratory    | 8              | 1 | 0 | 0 | 5              | 1 | 3  | 0  |
| Endocrine               | 0              | 0 | 0 | 0 | 0              | 1 | 0  | 0  |
| Neurology               | 1              | 2 | 0 | 0 | 0              | 1 | 1  | 1  |
| Dermatology             | 0              | 2 | 1 | 0 | 0              | 1 | 0  | 0  |
| Pain                    | 1              | 1 | 0 | 0 | 0              | 0 | 0  | 0  |
| Ocular/visual           | 0              | 0 | 0 | 0 | 0              | 1 | 0  | 0  |
| Lymphatics              | 1              | 0 | 0 | 0 | 0              | 0 | 0  | 0  |
